# Supplementary material for: Distribution and habitat characterization of the recently introduced invasive mosquito Aedes koreicus [Hulecoeteomyia koreica], a new potential vector and pest in north-eastern Italy
Source: PubMed Central journal article supplement (PMC3852218; doi:10.1186/1756-3305-6-292), 2013-10-10

**Figure 8**

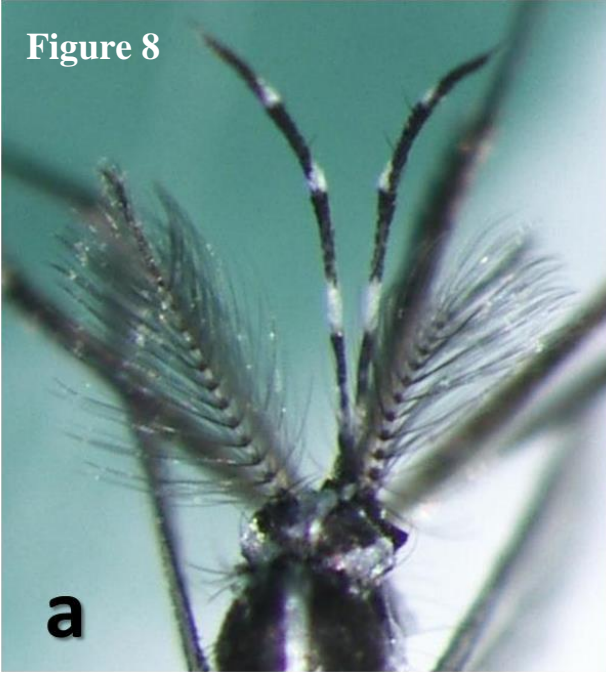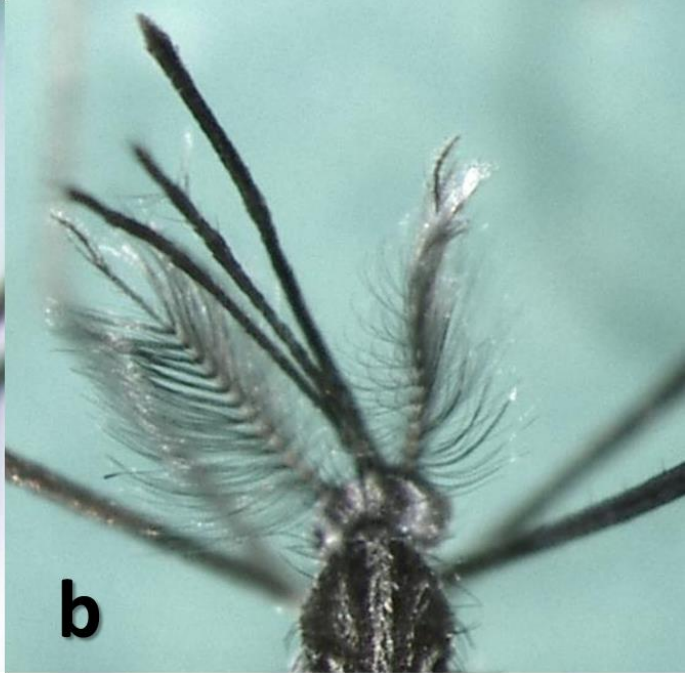

**Figure 9**

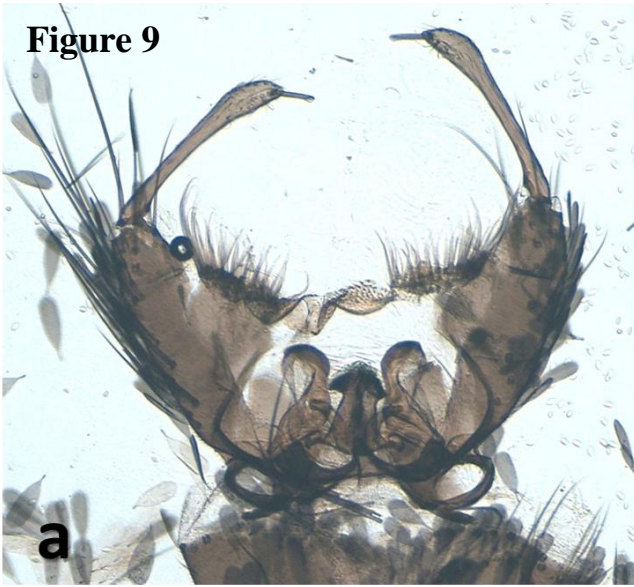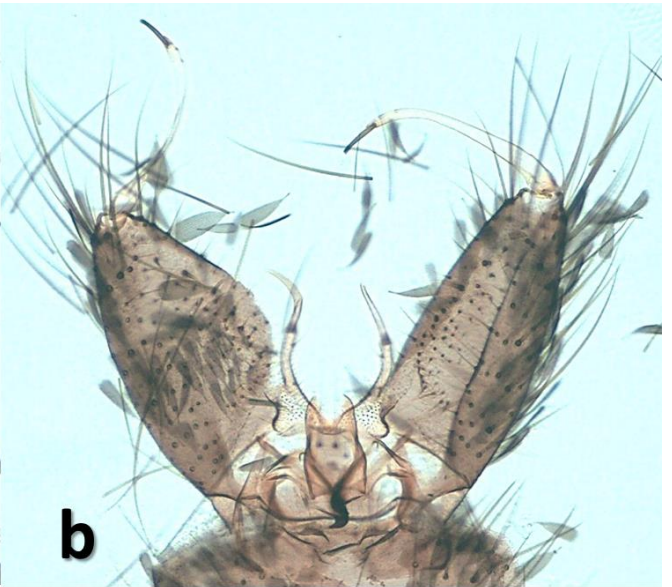

Supplement: 1756-3305-6-292-S6.pdf [file 1756-3305-6-292-S6.pdf]
